# Supplementary material
Source: ML conference proceedings conference paper supplement (https://proceedings.neurips.cc/paper_files/paper/2022/hash/735c847a07bf6dd4486ca1ace242a88c-Abstract.html)
Supplement: Supplementary file 1 [file 735c847a07bf6dd4486ca1ace242a88c-Supplemental-Conference.zip]

Archive with 37 entries (35 files):
- supplementary/
- __MACOSX/._supplementary
- supplementary/supp.pdf
- supplementary/.DS_Store
- __MACOSX/supplementary/._.DS_Store
- supplementary/videos/
- __MACOSX/supplementary/._videos
- supplementary/README.txt
- __MACOSX/supplementary/._README.txt
- supplementary/videos/movi-e-001.gif
- __MACOSX/supplementary/videos/._movi-e-001.gif
- supplementary/videos/movi-e-002.gif
- __MACOSX/supplementary/videos/._movi-e-002.gif
- supplementary/videos/movi-d-002.gif
- __MACOSX/supplementary/videos/._movi-d-002.gif
- supplementary/videos/movi-d-001.gif
- __MACOSX/supplementary/videos/._movi-d-001.gif
- supplementary/videos/traffic-002.gif
- __MACOSX/supplementary/videos/._traffic-002.gif
- supplementary/videos/traffic-001.gif
- __MACOSX/supplementary/videos/._traffic-001.gif
- supplementary/videos/aquarium-001.gif
- __MACOSX/supplementary/videos/._aquarium-001.gif
- supplementary/videos/movi-tex-002.gif
- __MACOSX/supplementary/videos/._movi-tex-002.gif
- supplementary/videos/aquarium-002.gif
- __MACOSX/supplementary/videos/._aquarium-002.gif
- supplementary/videos/movi-tex-001.gif
- __MACOSX/supplementary/videos/._movi-tex-001.gif
- supplementary/videos/catertex-001.gif
- __MACOSX/supplementary/videos/._catertex-001.gif
- supplementary/videos/movi-solid-001.gif
- __MACOSX/supplementary/videos/._movi-solid-001.gif
- supplementary/videos/catertex-002.gif
- __MACOSX/supplementary/videos/._catertex-002.gif
- supplementary/videos/movi-solid-002.gif
- __MACOSX/supplementary/videos/._movi-solid-002.gif
