# Supplementary material
Source: ML conference proceedings conference paper supplement (https://proceedings.neurips.cc/paper_files/paper/2022/hash/735c847a07bf6dd4486ca1ace242a88c-Abstract.html)
Supplement: Supplementary file 1 [file 735c847a07bf6dd4486ca1ace242a88c-Supplemental-Conference.zip › supplementary/README.txt]

This ZIP file provides the following supplementary materials:

1. supp.pdf is a PDF file containing the Appendix to the main paper.

2. videos/ is a directory containing videos of predicted segmentations comparing STEVE and SAVi. We provide a total of 14 videos --- 2 videos for each of the 7 textured datasets (CATERTex, MOVi-Solid, MOVi-Tex, MOVi-D, MOVi-E, Traffic, Aquarium). In each video, the two columns show predictions for STEVE and SAVi, respectively. The rows (from top to bottom) are: input video, true segmentation, predicted segmentation, predicted segmentation overlaid on the video, video masked using each predicted segment.
