# Supplementary material
Source: ML conference proceedings conference paper supplement (https://proceedings.neurips.cc/paper_files/paper/2022/hash/735c847a07bf6dd4486ca1ace242a88c-Abstract.html)

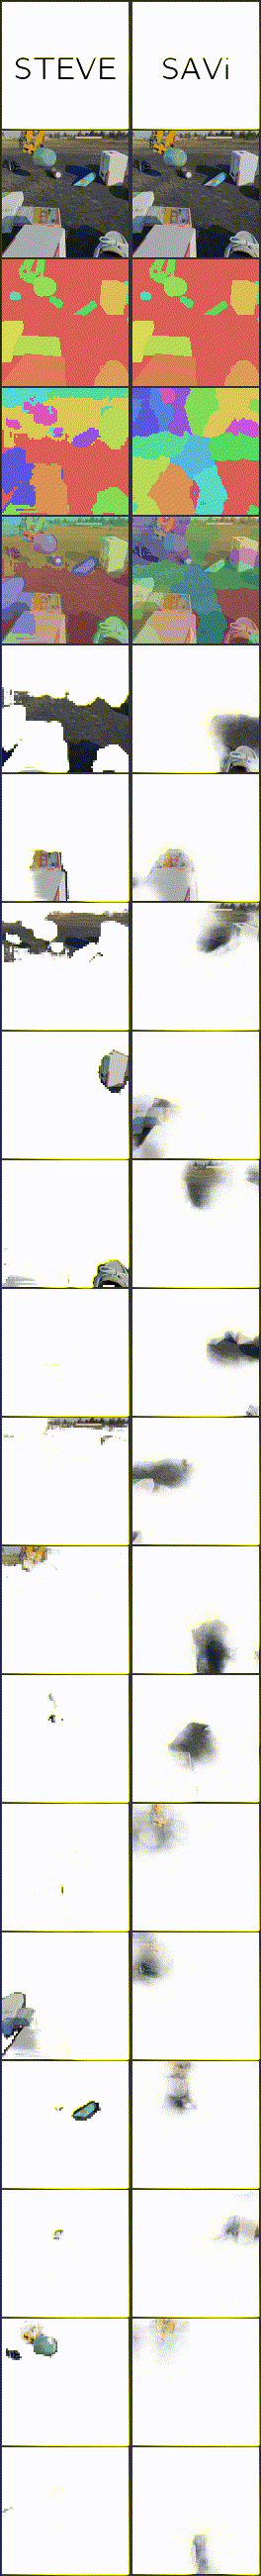

Supplement: Supplementary file 1 [file 735c847a07bf6dd4486ca1ace242a88c-Supplemental-Conference.zip › supplementary/videos/movi-e-001.gif]

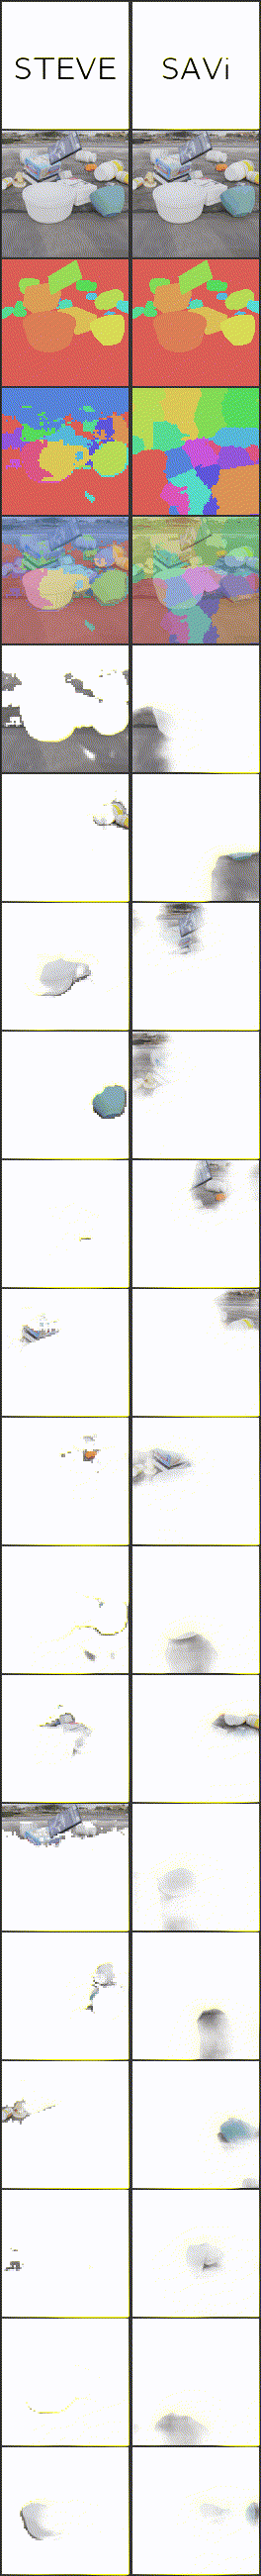

Supplement: Supplementary file 1 [file 735c847a07bf6dd4486ca1ace242a88c-Supplemental-Conference.zip › supplementary/videos/movi-e-002.gif]

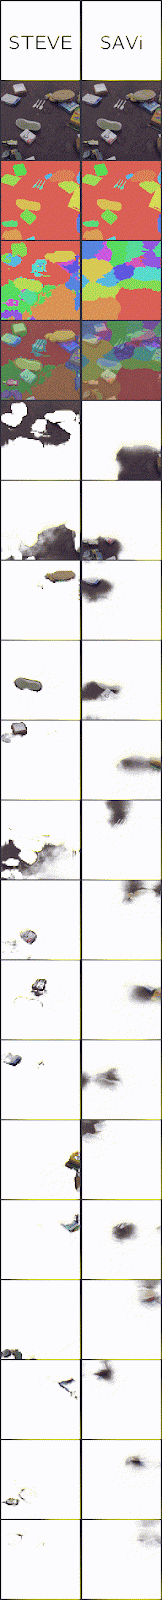

Supplement: Supplementary file 1 [file 735c847a07bf6dd4486ca1ace242a88c-Supplemental-Conference.zip › supplementary/videos/movi-d-002.gif]

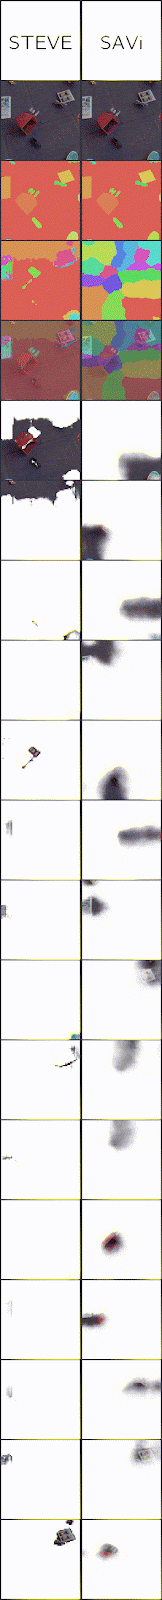

Supplement: Supplementary file 1 [file 735c847a07bf6dd4486ca1ace242a88c-Supplemental-Conference.zip › supplementary/videos/movi-d-001.gif]

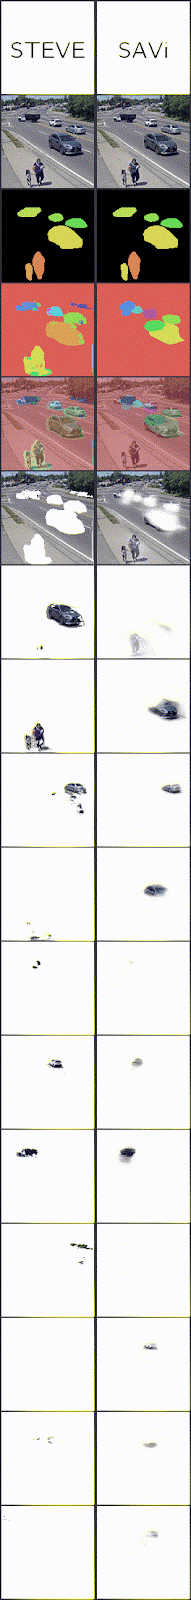

Supplement: Supplementary file 1 [file 735c847a07bf6dd4486ca1ace242a88c-Supplemental-Conference.zip › supplementary/videos/traffic-002.gif]

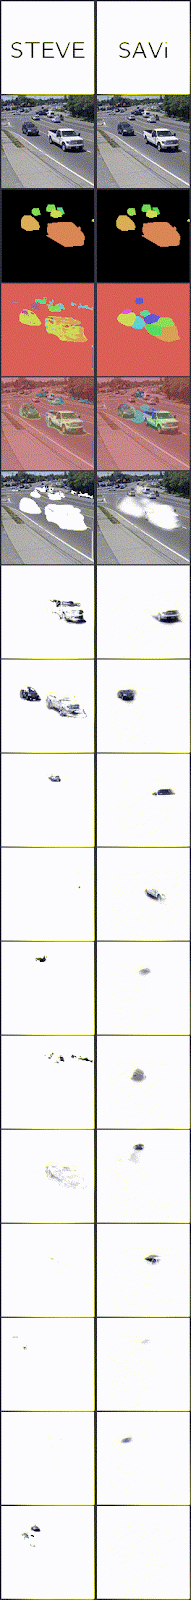

Supplement: Supplementary file 1 [file 735c847a07bf6dd4486ca1ace242a88c-Supplemental-Conference.zip › supplementary/videos/traffic-001.gif]

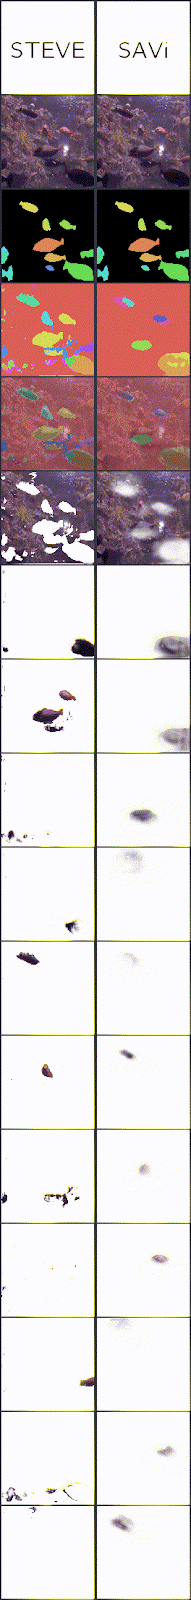

Supplement: Supplementary file 1 [file 735c847a07bf6dd4486ca1ace242a88c-Supplemental-Conference.zip › supplementary/videos/aquarium-001.gif]

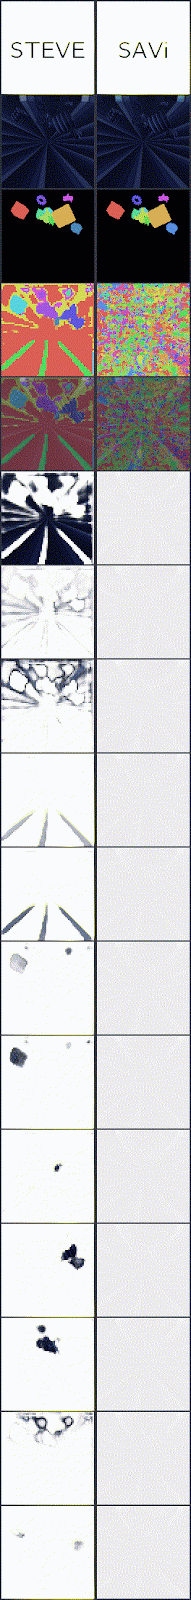

Supplement: Supplementary file 1 [file 735c847a07bf6dd4486ca1ace242a88c-Supplemental-Conference.zip › supplementary/videos/movi-tex-002.gif]

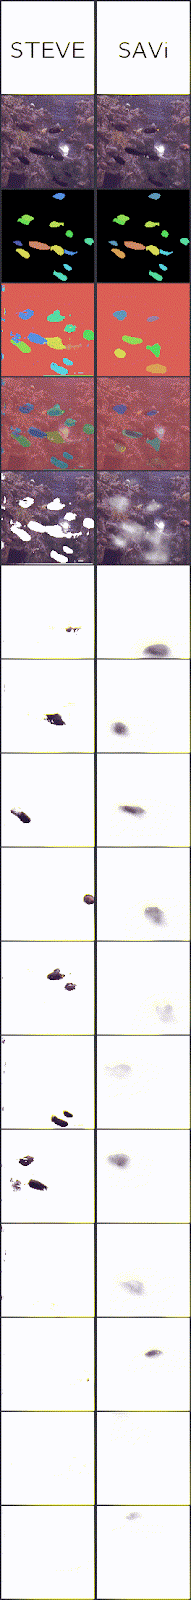

Supplement: Supplementary file 1 [file 735c847a07bf6dd4486ca1ace242a88c-Supplemental-Conference.zip › supplementary/videos/aquarium-002.gif]

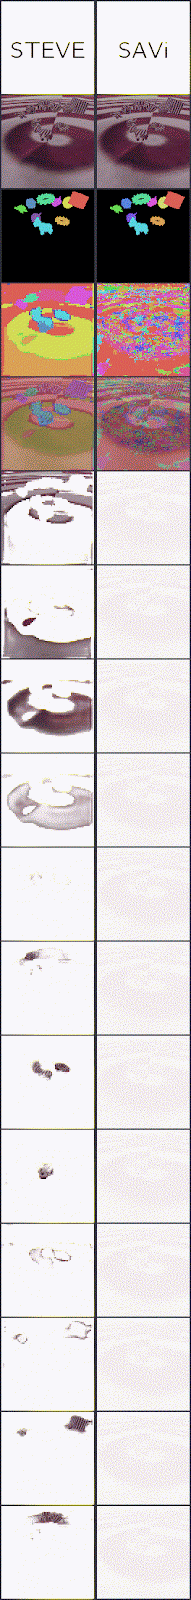

Supplement: Supplementary file 1 [file 735c847a07bf6dd4486ca1ace242a88c-Supplemental-Conference.zip › supplementary/videos/movi-tex-001.gif]

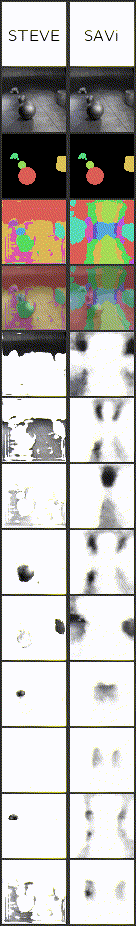

Supplement: Supplementary file 1 [file 735c847a07bf6dd4486ca1ace242a88c-Supplemental-Conference.zip › supplementary/videos/catertex-001.gif]

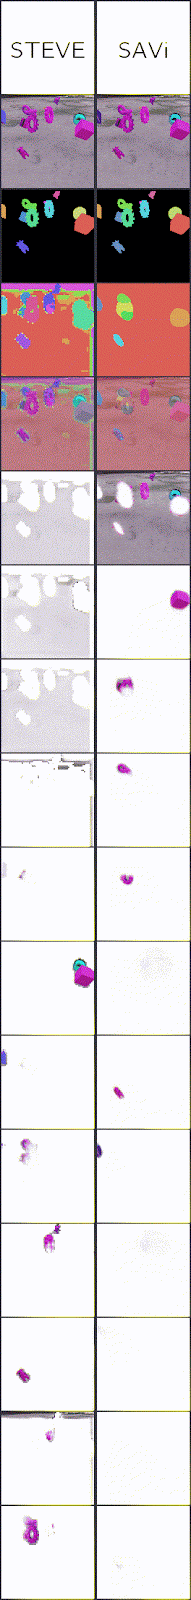

Supplement: Supplementary file 1 [file 735c847a07bf6dd4486ca1ace242a88c-Supplemental-Conference.zip › supplementary/videos/movi-solid-001.gif]

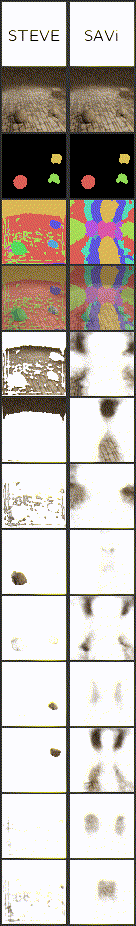

Supplement: Supplementary file 1 [file 735c847a07bf6dd4486ca1ace242a88c-Supplemental-Conference.zip › supplementary/videos/catertex-002.gif]

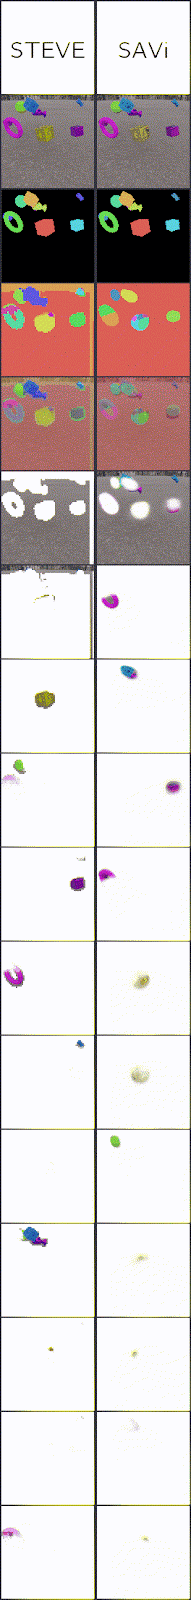

Supplement: Supplementary file 1 [file 735c847a07bf6dd4486ca1ace242a88c-Supplemental-Conference.zip › supplementary/videos/movi-solid-002.gif]
